# Supplementary material
Source: PubMed Central journal article supplement (PMC6727196)

**Figure S1**

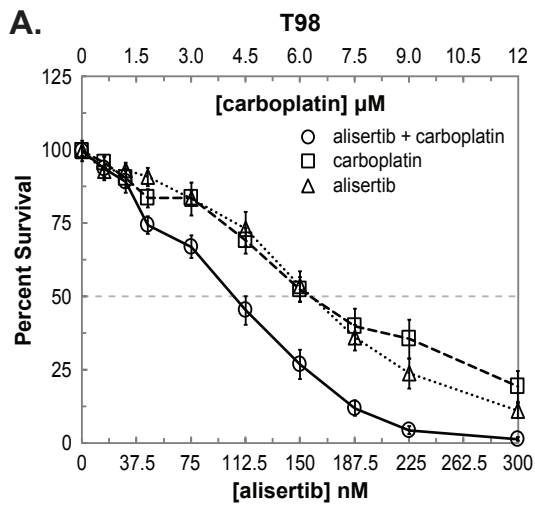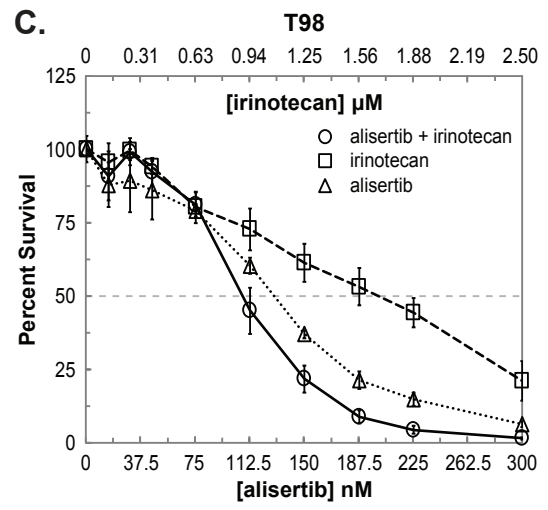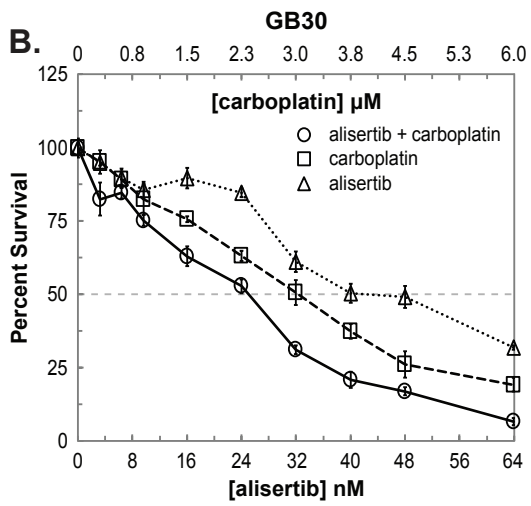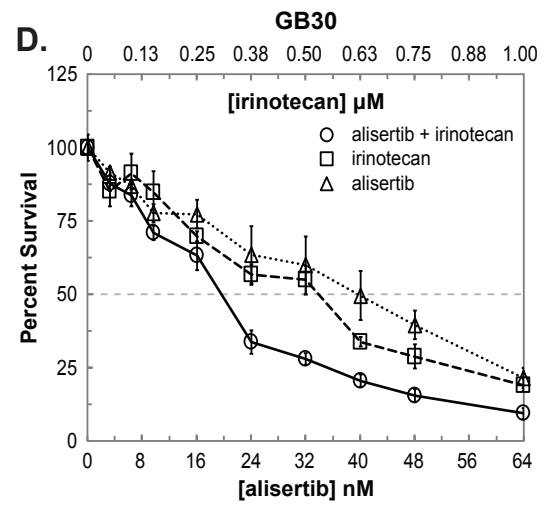

Supplement: NIHMS1527568-supplement-11060_2019_3164_MOESM1_ESM.pdf [file NIHMS1527568-supplement-11060_2019_3164_MOESM1_ESM.pdf]
